# Supplementary material for: Toward the Quantification of a Conceptual Framework for Movement Ecology Using Circular Statistical Modeling
Source: PLOS journal article supplement (doi:10.1371/journal.pone.0050309), 2012-11-30
Supplement: S7 (10.1371/journal.pone.0050309.s007) [file journal.pone.0050309.s007]

## Appendix-S7. Two examples of non-oriented trajectories produced by circular auto-regression

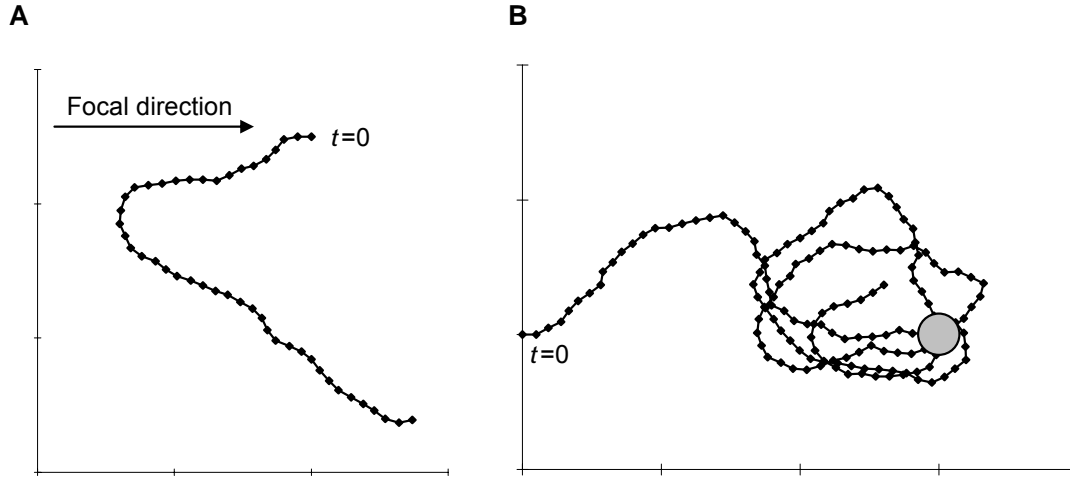

**Figure S7.** (A) Example of a simulated trajectory of C-AR(VM) of  $\alpha = 0$ ,  $w = 0.99$ ,  $\kappa = 12$ . Starting toward the opposite direction to  $\alpha$ , the trajectory is gradually changing toward the focal direction  $\alpha$ . (B) An example of a simulated trajectory of C-AR(VM) with the focal point at  $(30, 0)$ ,  $w = 0.8$ ,  $\kappa = 6$ . Starting from  $(0, 0)$ , the trajectory is wandering around the focal point and draws looping. The speed is fixed at 1 and the grid unit is 10 throughout.
